# Supplementary material for: Catalytic tin radical mediated tricyclisations. Part 2 †‡
Source: Royal Society of Chemistry journal article supplement (doi:10.1039/b000662i), 2000-01-01
Supplement: b000662i.doc [file b000662i.doc]

# Supplementary Data

**Catalytic tin radical mediated tricyclisations. II**

**David R. Kelly* and Mark R. Picton**

*Department of Chemistry, Cardiff University, P. O. Box 912, Cardiff, Wales, UK CF10 3TB*

**Prop-2'-ynyl 2,3-dideoxy-4-*O*-(prop-2'-enyl)-6-*O*-*tert*-butyl-dimethyl­silyl--D-*erythro*-hex-2-enopyranoside 15a and prop-2'-ynyl 2,3-dideoxy-4,6-di-*O*-(prop-2'-enyl)--D-*erythro*-hex-2-enopyranoside 16**

(Prop-2'-ynyl) 2,3-dideoxy-6-*O*-*tert*-butyl-dimethylsilyl--D-*erythro*-hex-2-enopyr­an­oside **14a** (300 mg, 1.0 mmol) was dissolved in dry DMF (2 ml) and treated with sodium hydride (60% suspension in mineral oil, 44 mg ∫ 26 mg, 1.1 mmol, 1.1 equiv.) under nitrogen. Allyl iodide (250 mg, 1.5 mmol, 1.5 equiv.) was added dropwise to maintain a reaction temperature below 5∞C and stirred under nitrogen for 18 hours. TLC analysis indicated a complex mixture of products. The reaction solution was evaporated to dryness, redissolved in CHCl3 (5 ml) and washed with water (3 x 5 ml). The organic layer was evaporated to approx 1ml then purified by flash column chromatography; eluent hexane to 10% ethyl acetate to afford the 4-*O*-allyl compound **15a** (140 mg, 41%), starting material **14a** (110 mg, 33%) and 4,6-di-*O*-allyl ether **16** (8 mg, 3.1%). **Spectroscopic data for prop-2'-ynyl 2,3-dideoxy-4-*O*-(prop-2'-enyl)-6-*O*-*tert*-butyl-dimethylsilyl--D-*erythro*-hex-2-enopyranoside 15a** Combustion analysis C18H30O4Si requires C 63.91 H 8.86 found C 63.69 H 8.96; H 5.97 (1H, d, *J* 10.2, 3-H); 5.81 (1H, ddt, *J* 17.1, 10.6, 5.3, 11-H); 5.68 (1H, dt, *J* 10.3, 2.3, 2-H); 5.27 (1H, dq, *J* 17.2, 1.5, 12a-H); 5.20 (2H, m, 1-H, 12b-H); 4.22 (2H, d, *J* 2.4, 7-H2); 4.14 (1H, m, 6a-H); 3.95 (1H, dt *J* 5.5, 1.4, 6b-H); 3.90 (1H, m, 4-H); 3.79 (1H, dd, *J* 10.9, 1.5, 10a-H); 3.70 (2H, m, 5-H, 10b-H); 2.33 (1H, t, *J* 2.4, 9-H); 0.83 (9H, s, 16-H3, 17-H3, 18-H3, (C**H3**)3CSi); 0.01 (6H, s, 14-H3, 15-H3, (C**H3**)2Si); H (C6D6) 5.72 (1H, d, *J* 10.2, 3-H); 5.65 (1H, ddd, *J* 22.5, 10.5, 5.3, 11-H); 5.47 (1H, dt, *J* 10.4, 2.3, 2-H); 5.07 (1H, dd, *J* 10.4 (estimated, overlaps 1-H); 1.7, 12a-H); 5.05 (1H, s, 1-H); 4.89 (1H, dd, 10.4, 1.3, 12b-H); 4.10 (2H, m, 6-H2); 3.91 (1H, dd, *J* 9.4, 1.2, 7a-H); 3.85 (1H, ddd, *J* 9.4, 3.9, 2.1, 7b-H); 3.71 (3H, m, 4-H, 5-H, 10a-H); 3.65 (1H, dd, 13.0, 5.3, 10b-H); 1.86 (1H, t, *J* 2.4, 9-H); 0.97 (9H, s, 16-H3, 17-H3, 18-H3, (C**H3**)3CSi); 0.01 (6H, s, 13-H3, 14-H3, (C**H3**)2Si); C 135.1 (CH, 11-C); 131.8 (CH, 3-C); 126.5 (CH, 2-C); 117.5 (CH2, 12-C); 92.9 (CH, 1-C); 80.1 (C, 8-C); 74.7 (CH, 9-C); 71.3 (CH, 4-C); 70.4 (CH, 5-C); 70.2 (CH2, 10-C); 63.0 (CH2, 6-C); 54.9 (CH2, 7-C); 26.4 (3CH3, 16-C, 17-C, 18-C, (**C**H3)3CSi); 19.9 (C, 15-C); *m/z* (EI+) 339 (18%, M+1); 338 (28%, M, C18H30O4Si); 337 (87%, M-1); 283 (23%, M - HC∫CCH2O+); 226 (36%, M - HC∫CCH2OH - H2C=CHCH2O+); 223 (36%); 164 (48%, M - tBuMe2SiOCH2CHO);129 (38%); 117 (100%, Me2SiOCH2CHO; aldehyde from retro Diels-Alder - tBu); 89 (94%); 81 (83%); 73 (73%, C4H9O+); 57 (54%, C3H5O+); 55 (55%, C3H3O+); *v*max (neat) 2954; 2930; 2898; 2858; 2106 (weak, C∫C); 1463; 1255; 1124; 1093; 1063 (str.); 838; Rf0.85 (hexane:EtOAc, 50:50).

**Prop-2'-ynyl 2,3-dideoxy-4-*O*-(prop-2'-enyl)-6-*O*-pivaloyl--D-*erythro*-hex-2-enopyranoside 15b and (prop-2'-ynyl) 2,3-dideoxy-4,6-di-*O*-(prop-2'-enyl)--D-*erythro*-hex-2-enopyranoside 16**

Prop-2'-ynyl 2,3-dideoxy-6-*O*-pivaloyl--D-*erythro*-hex-2-eno­pyran­o­side **14b** (1.60 g, 6.3 mmol) was dissolved in dry DMF (15 ml) and treated with sodium hydride (60% suspension in mineral oil, 380 mg ∫ 226 mg, 9.5 mmol, 1.5 equiv.) under nitrogen. Allyl iodide (1.60 g, 9.5 mmol, 1.5 equiv.) was added dropwise to maintain a reaction solution temperature of  5°C and stirred under nitrogen for 18 hours. The solution was filtered and evaporated to dryness, TLC analysis indicated a complex mixture of products. Purification by flash column chromatography; eluent hexane to 10% ethyl acetate afforded the title compound **15b** (510 mg, 28%), **16** (60 mg, 3.1%) and recovered starting material **14b** (220 mg, 14%).

**Spectroscopic data for prop-2'-ynyl 2,3-dideoxy-4-(prop-2'-enyl)-6-*O*-pivaloyl--D-*erythro*-hex-2-enopyranoside 15b** H 6.09 (1H, dd, *J* 10.1, 1.1, 3-H); 5.88 (1H, ddt, *J* 17.4, 10.5, 5.7, 11-H); 5.78 (1H, ddd, *J* 10.3, 2.7, 2.0, 2-H); 5.27 (1H, ddd, *J* 17.2, 3.1, 1.5, 12a-H); 5.20 (1H, m, 12b-H); 5.17 (1H, t, *J* 1.3, 1-H); 4.33 (3H, m, 6-H2, 10a-H); 4.14 (2H, m, 7a-H, 10b-H); 3.99 (2H, m, 7b-H, 5-H); 3.90 (1H, dq, *J* 9.5, 1.5, 4-H); 2.44 (1H, dd, *J* 2.4, 2.4, 9-H); 1.23 (9H, s, 15-H3, 16-H3, 17-H3, C(C**H3**)3); C 178.6 (C, 13-C, C=O); 134.7 (CH, 11-C); 131.2 (CH, 3-C); 126.6 (CH, 2-C); 117.6 (CH2, 12-C) 92.7 (CH, 1-C); 79.6 (C, 8-C); 74.7 (CH, 4-C); 70.8 (CH, 5-C); 70.3 (CH2, 10-C); 68.7 (CH, 9-C); 64.1 (CH2, 7-C); 54.9 (CH2, 6-C); 39.2 (C, 14-C); 27.6 (3CH3, 15-C, 16-C, 17-C, C(**C**H3)**3**); *m/z* (EI+) 308 (absent, M, C17H24O5); 307 (3%, M - H); 253 (64%, M - H2C=CH-CH2O); 164 (72%, diene from retro Diels-Alder); 151 (100%); 125 (44%, diene from retro Diels-Alder - HC∫C-CH2); 123 (67%, diene from retro Diels-Alder - H2C=CH-CH2O); 81 (61%); 57 (87%); *v*max(CDCl3) 3320 (C∫**C-H**); 2975; 2100 (weak, -**C∫C**H); 1730 (str., C=O); 1460; 1410; 1360; 1300; 1159; Rf 0.70 (hexane:EtOAc).

**Spectroscopic data for prop-2'-ynyl 2,3-dideoxy-4,6-di-*O*-(prop-2'-enyl)--D-*erythro*-hex-2-enopyranoside 16** H 6.06 (1H, d, *J* 10.2, 3-H); 5.91 (2H, m, 11-H, 14-H); 5.76 (1H, dt, *J* 10.2, 2.3, 2-H); 5.29 (1H, dd, *J* 17.2, 1.6, 12a-H or 15a-H); 5.27 (1H, dd, *J* 17.1, 1.2, 12b-H or 15b-H); 5.18 (3H, m, 1-H, 15-H2 or 12-H2); 4.28 (2H, m, 7-H2); 4.14 (5H, m, 4-H, 10-H2, 13-H2); 3.85 (1H, dt, *J* 9.5, 3.2, 5-H); 3.67 (2H, d, *J* 3.2, 6-H2); 2.44 (1H, dd, 2.4, 2.4, 9-H); Rf 0.85 (hexane:EtOAc).

**Preparation of [2a*R*-(2a,6a,8,8a,8b,8c)]-(1,1-dimethyl­ethyl)­[(2a,3,5,6a,8,8a,8b,8c-octahydro-2*H*-difuro[2,3,4-*de*:4',3',2'-*ij]*[2]­benzo­pyran-8-yl)methoxy]dimethylsilane 17a and [2a*S*-(2a,3a,5a,7,7a,7b, 7c)]-(1,1-dimethylethyl)[[octahydro-3a-[(tri-*n*-butyl­stannyl)­methyl]-2*H*,3*H*-1,5,6-trioxacyclopent[*jkl*]-*as*-indacenyl-7-yl]­meth­oxy]­dimethylsilane 18a**

(Prop-2'-ynyl) 2,3-dideoxy-4-(Prop-2'-enyl)-6-*O*-*tert*-butyl-dimethyl­silyl--D-*erythro*-hex-2-eno­pyranoside **15a** (60 mg, 0.18 mmol) was dissolved in dry toluene (2 ml) and warmed to reflux. AIBN (2 mg, 0.008 mmol, 0.04 equiv.) was added portionwise. A solution of tri-*n*-butyltin hydride (78 mg, 0.27 mmol, 1.5 equiv.) in dry toluene (2 ml) was added dropwise over 3.5 hours *via* a syringe pump. The reaction solution was then refluxed for 18 hours. TLC analysis indicated a complex mixture of products. Purification by flash column chromatography, eluent hexane to 10% diethyl ether afforded **17a** (19 mg, 23%) as a white, waxy solid and **18a** (16 mg, 15%) as a clear oil plus an inseparable mixture of products. **Spectroscopic data for [2a*R*-(2a,6a,8,8a,8b,8c)]-(1,1-dimethyl­ethyl)­[(2a,3,5,6a,8,8a,8b,8c-octahydro-2*H*-difuro[2,3,4-*de*:4',3',2'-*ij]*[2]­benzo­pyran-8-yl)methoxy]dimethylsilane 17a** Combustion analysis C18H30O4Si requires C 63.87, H 8.93; found C 64.08, H 8.82; H 6.02 (1H, br d, *J* 6.7, 14-H); 5.47 (1H, d, *J* 5.5, 1-H); 4.34 (1H, dm, *J* 10.6, 8a-H); 4.28 (1H, dm, *J* 10.6, 8b-H); 4.15 (1H, dd, *J* 7.7, 4.0, 4-H); 3.84 (2H, m, 11a-H, 15a-H); 3.72 (2H, m, 3-H, 15b-H); 3.31 (1H, dd, *J* 11.4, 7.2, 11b-H); 2.64 (1H, br m, 6-H); 2.25 (2H, m, 5-H, 13a-H); 1.92 (1H, app. qdd ∫ ddddd, *J* 11.8, 11.8, 11.8, 6.4, 2.6, 12-H); 1.81 (1H, br. tm, *J* circa 13, 13b-H); 0.91 (9H, s, 19-H3, 20-H3, 21-H3, (C**H3**)3CSi); 0.04 (6H, s, 16-H3, 17-H3, (C**H3**)2Si); 1H-1H *J*-COSY NMR, 1-H to 6-H to 5-H to 4-H to 3-H to 15a-H to 15b-H to 3-H; 5-H to 12-H to 13a-H to 13b-H; 13a to 14-H; 11a-H to 12-H to 11b-H (both weak); H (C6D6) 5.53 (1H, br d, *J* 6.2, 14-H); 5.41 (1H, d, *J* 5.9, 1-H); 4.11 (1H, d, *J* 10.6, 8a-H); 4.07 (1H, dd, *J* 6.5, 5.5, 4-H); 4.01 (1H, ddd, *J* 10.6, 1.4, 1.4, 8b-H); 3.85 (1H, ddd, *J* 4.8, 4.8, 4.8, 3-H); 3.77 (1H, dd, *J* 10.9, 3.6, 15a-H); 3.65 (1H, dd, *J* 11.4, 4.4, 15b-H); 3.64 (1H, app. dd, *J* 6.4, 6.4, 11a-H); 3.06 (1H, dd, *J* 10.9, 7.1, 11b-H); 2.19 (1H, br m, 6-H); 1.74 (3H, br m, 5-H, 12-H, 13a-H); 1.30 (1H, br m, 13b-H); 0.91 (9H, s, 19-H3, 20-H3, 21-H3, (C**H3**)3CSi); 0.03, 0.01 (6H, s, s, 16-H3, 17-H3, (C**H3**)2Si); 1H-1H *J*-COSY NMR (C6D6) 1-H to 6-H to 5-H to 4-H to 3-H; 15a-H to 15b-H to 3-H; 8a-H to 8b-H; 11a-H to 11b-H to 12-H to 11a-H; 12-H to 13b-H to 13a-H; C 138.8 (C, 7-C); 124.0 (CH, 14-C); 98.2 (CH, 1-C); 81.0 (CH, 4-C); 71.0 (CH, 3-C); 70.6, 69.8 (CH2, CH2, 11-C, 8-C); 65.9 (CH2, 15-C); 44.7, 42.9 (CH, CH, 5-C, 6-C); 38.6 (CH, 12-C); 26.3 (CH3, 19-C, 20-C, 21-C, (**C**H3)3CSi); 25.7 (CH2, 13-C); 18.2 (C, 18-C); *m/z* (EI) 339 (M+1, 7%); 338 (M, C18H30O4Si, absent); 280 (29%); 237 (23%); 163 (61%); 117 (92%); 105 (100%); 75 (98%); *v*max 2951; 2928; 2856; 1254; 1123; 1048; 837; Rf 0.15 (hexane:Et2O).

| Table 1. Coupling constant correlation **17a** in CDCl3 and (C6D6) | | | | | | | |
| --- | --- | --- | --- | --- | --- | --- | --- |
| Signal | Coupling constants | | | | | | |
| 1-H | 5.5 (5.9) |  |  |  |  |  |  |
| 6-H | ? (?) |  | ? (?) |  |  |  |  |
| 5-H |  | ? (?) | ? (?) | ? (?) |  |  |  |
| 4-H |  |  |  | 7.7 (6.5) | 4.0 (5.5) |  |  |
| 3-H |  |  |  |  | ? (4.8) | ? (4.8) | ? (4.8) |
| 15a-H |  |  | ? (10.9) |  |  | ? (3.6) |  |
| 15b-H |  |  | ? (11.4) |  |  |  | ? (4.4) |
| 8a-H |  |  |  | 10.6 (10.6) |  |  |  |
| 8b-H |  |  |  | 10.6 (10.6) | (1.4) |  |  |
| 11a-H | 11.4 (10.9) |  |  |  | 7.2 (7.1) |  |  |
| 11b-H | ? (?) |  |  | ? (?) |  |  |  |
| 12-H |  | 11.8 (?) | 11.8 (?) | 11.8 (?) | 6.4 (?) | 2.6 (?) |  |
| 13a-H | ? (?) |  |  |  |  | ? (?) | ? (?) |
| 13b-H | ca 13 (?) |  | ca 13 (?) |  | "br." (?) |  |  |
| 14-H |  |  |  |  | "br." (?) |  | 6.7 (6.2) |
| Couplings measured in CDCl3 are shown without brackets. Those in C6D6 are shown in brackets. Question marks indicate couplings which could not be measured in the signal indicated | | | | | | | |

**Spectroscopic data for [2a*S*-(2a,3a,5a,7,7a,7b, 7c)]-(1,1-dimethylethyl)[[octahydro-3a-[(tri-*n*-butyl­stannyl)­methyl]-2*H*,3*H*-1,5,6-trioxacyclopent[*jkl*]-*as*-indacenyl-7-yl]methoxy]dimethylsilane 18a** Combustion analysis; C30H56O4SiSn requires C 57.42, H 9.00; found C 57.69, H 9.19; H 5.37 (1H, d, *J* 7.5, 1-H); 3.85 (1H, dd, *J* 11.3, 2.3, 11a-H or 14a-H); 3.78 (1H, dd, *J* 9.4, 9.4, 11a-H or 14a-H); 3.65 (5H, m, 3-H, 4-H, 8a-H, 11b-H, 14b-H); 3.18 (1H, d, *J* 8.9, 8b-H); 2.96 (1H, m, 12-H); 2.80 (1H, ddd, *J* 9.5, 9.5, 9.5, 5-H); 2.26 (1H, dd, *J* 9.9, 7.6, 6-H); 1.60 (2H, app. d, *J* 8.5, 13-H2); 1.34 (6H, m, 24-H6, Sn(CH2)2C**H2**); 1.21 (7H, m, 15a-H, 23-H6, SnCH2C**H2**); 0.97 (1H, d, *J* 3.2, 15b-H); 0.81 (18H, m, 19-H3, 20-H3, 21-H3, 25-H9, (C**H3**)3CSi, Sn(CH2)3C**H3**); 0.76 (6H, m, 22-H6, SnC**H2**); 0.03, 0.02 (s, s, 16-H, 17-H, (C**H3**)2Si); 1H-1H *J*-COSY NMR, 1-H to 6-H to 5-H to 4-H; 5-H to 12-H (weak) to 13-H2; 8a-H to 8b-H; 11b-H to 12-H; 15a-H to 15b-H; 22-H6 to 23-H6 to 24-H6 to 25-H9; H (C6D6) 5.61 (1H, d, *J* 8.7, 1-H); 4.22 (1H, d, *J* 10.6, 11a-H); 4.11 (2H, m, 14-H2); 4.04 (1H, dd, *J* 11.2, 3.9, 11b-H); 3.85 (1H, d, *J* 8.5, 8a-H); 3.63 (2H, m, 3-H, 4-H); 3.26 (1H, d, *J* 8.7, 8b-H); 2.67 (2H, 5-H, 12-H); 2.13 (1H, t, *J* 8.7, 6-H); 1.66 (1H, m, 13a-H); 1.57 (7H, m, 13b-H, 24-H6, Sn(CH2)2-C**H2**); 1.41 (6H; m, 23-H6, SnCH2C**H2**); 1.16 (1H, d, *J* 13.1, 15a-H); 1.10 (9H, s, 19-H3, 20-H3, 21-H3, (C**H3**)3CSi); 1.03 (10H, m, 15b-H, 25-H9, Sn(CH2)3C**H3**); 0.93 (6H, m, 22-H6, SnC**H2**);0.38, 0.34 (6H, s, s, 16-H3, 17-H3, (C**H3**)2Si); 1H-1H *J*-COSY NMR (C6D6) 1H to 6-H to 5-H to 4-H; 8a-H to 8b-H; 11a-H to 11b-H; 22-H6 to 23-H6 to 24-H6 to 25-H9; C 100.5 (CH, 1-C); 76.3 (CH2, 11-C); 72.0, 71.4 (CH, CH, 3-C, 4-C); 71.0 (CH2, 8-C); 64.7 (CH2, 14-C); 59.1 (C, 7-C); 54.6 (CH, 12-C); 48.7 (CH, 6-C); 45.9 (CH2, 13-C); 43.8 (CH, 5-C); 29.6 (CH2, 24-C, Sn(CH2)2**C**H2); 27.8 (CH2, SnCH2**C**H2, 23-C); 26.4 (CH3, 19-C, 20-C, 21-C, (**C**H3)3CSi); 22.1 (CH2, 15-C); 18.9 (C, 18-C); 14.1 (CH3, 25-C, Sn(CH2)3**C**H3); 10.3 (CH2, 24-C, Sn**C**H2); *m/z* (EI+, peaks marked with * are tin cluster maxima) 630* (1%, C30H58O4SiSn, M+); 568* (96%); 512* (7%) 457* (6%); 439* (4%); 369* (2%); 287* (42%); 233* (525); 177* (100%); 57 (88%) *v*max(CDCl3) 2931; 1472; 1387; 1257; 1053; Rf 0.60 (hexane:Et2O)

**Preparation of [2a*R*-(2a,6a,8,8a,8b,8c)]-[(2a,3,5,6a,8,8a,8b,8c-octahydro-2*H*-difuro[2,3,4-*de*:4',3',2'-*ij]*[2]­benzo­pyran-8-yl)methoxy] 2,2-dimethylpropanoate 17b and [2a*S*-(2a,3a,5a,7,7a,7b,7c)]-[[octa­hydro-3a-[(tri-phenylstannyl)­methyl]-2*H*,3*H*-1,5,6-trioxa­cyclo­pent­[*jkl*]-*as*-indacenyl-7-yl]meth­oxy] 2,2-dimethyl­prop­an­oate 18b**

(Prop-2'-ynyl)-2,3-dideoxy-4-*O*-(prop-2'-enyl)-6-*O*-pivaloyl--D-*erythro*-hex-2-eno­pyran­oside **15b** (50 mg, 0.16 mmol) and AIBN (2 mg, 0.006 mmol, 0.04 equiv.) were dissolved in dry toluene (3 ml) and warmed to reflux under nitrogen. A solution of triphenyltin hydride (85 mg, 0.24 mmol, 1.5 equiv.) in toluene (3 ml) was added dropwise from a syringe pump and the reaction solution allowed to reflux for 18 hours. TLC analysis indicated a complex mixture containing two major products. Purification by flash column chromatography, eluent hexane to 25% ethyl acetate afforded the stannane **17b** (11 mg, 9.6%) and a mixture containing the second major product. Two further coulmns gave the dioxahydrindacene **18b** (2 mg, 4%). **Spectrosopic data for [2a*R*-(2a,6a,8,8a,8b,8c)]-[(2a,3,5,6a,8,8a,8b,8c-octahydro-2*H*-difuro[2,3,4-*de*:4',3',2'-*ij]*[2]­benzo­pyran-8-yl)methoxy] 2,2-dimethylpropanoate 17b** H (C6D6) 5.65 (1H, broad m, 14-H); 5.15 (1H, d, *J* 5.9, 1-H); 4.40 (1H, dd, *J* 11.7, 7.6, 15a-H); 4.16 (1H, dd, *J* 11.7, 4.5, 15b-H); 4.15 (1H, dd, *J* 10.6, 1.2, 8a-H); 4.03 (2H, m, 3-H, 8b-H); 3.64 (1H, dd, *J* 6.9, 5.6, 4-H or 11a-H); 3.58 (1H, dd, *J* 6.8, 6.2, 4-H or 11a-H); 3.06 (1H, dd, *J* 11.0, 7.1, 11b-H); 2.15 (1H, br m, 6-H); 1.7 (2H, m, 5-H, 13a-H); 1.36 (2H, m, 12-H, 13b-H); 1.21 (9H, s, 18-H3, 19-H3, 20-H3); Rf 0.4 (hexane:EtAcO, 75:25).

**Spectroscopic data for [2a*S*-(2a,3a,5a,7,7a,7b,7c)]-[[octa­hydro-3a-[(tri-phenylstannyl)­methyl]-2*H*,3*H*-1,5,6-trioxa­cyclo­pent­[*jkl*]-*as*-indacenyl-7-yl]meth­oxy] 2,2-dimethyl­prop­an­oate 18b** H 7.52 (6H, m, 22-H3, 24-H3); 7.36 (9H, m, 21-H3, 23-H3, 25-H3); 5.12 (1H, d, *J* 7.7, 1-H); 4.45 (1H, dd, *J* 11.9, 2.5, 14a-H); 4.34 (1H, dd, *J* 11.9, 6.0, 14b-H); 3.72 (4H, m, 4-H, 8a-H, 11-H2); 3.34 (1H, d, *J* 9.2, 8b-H); 3.11 (1H, m, 3-H); 2.86 (1H, ddd, *J* 9.4, 9.4, 9.4, 5-H); 2.43 (1H, dd, *J* 9.8, 7.7, 6-H); 1.99 (1H, d, *J* 11.5, 13a-H); 1.81 (2H, m, 12-H, 13b-H); 1.21 (11H, m, 18-H3, 19-H3, 20-H3, 15-H2, C(C**H3**)3, C**H2**SnPh3); H (C6D6) 7.61 (6H, m, 22-H3, 24-H3); 7.52 (9H, m, 21-H3, 23-H3, 25-H3); 5.21 (1H, d, *J* 7.9, 1-H); 4.61 (1H, dd, *J* 11.7, 2.7, 14a-H); 4.34 (1H, dd, *J* 11.7, 6.8, 14b-H); 4.03 (1H, ddd, *J* 9.4, 6.9, 2.4, 3-H); 3.66, 3.63 (2H, overlapping doublets, separations 8.9 & 9.3 Hz, 8a-H, 4-H, respectively); 3.40 (1H, dd, *J* 8.8, 5.7, 11a-H); 3.33 (1H, dd, *J* 8.8, 1.8, 11b-H); 3.24 (1H, d, *J* 9.0, 8b-H); 2.54 (1H, br m, 12-H); 2.39 (1H, ddd, *J* 9.5, 9.5, 9.5, 5-H); 2.10 (1H, dd, *J* 9.6, 8.0, 6-H); 1.64 (1H, d, *J* 11.5, 15a-H); 1.53 (1H, m, 13a-H); 1.45 (1H, d, *J* 11.5, 15b-H); 1.38 (1H, m, 13b-H); Rf 0.25 (hexane:EtAcO, 75:25).

**Prop-2'-enyl 2,3-dideoxy--D-*erythro*-hex-2-eno­pyranoside 24b**

Prop-2'-enyl 4,6-di-*O*-acetyl-2,3-dideoxy--D-*erythro*-hex-2-enopyran­oside **24a** (5.0g, 18.6 mmol) was dissolved in dry methanol (200 ml). Sodium methoxide was added portionwise until the reaction solution was basic to universal indicator paper. The solution was stirred under nitrogen for 16 hours. TLC analysis indicated the absence of starting material. The solution was neutralised with cardice, filtered and concentrated to a yellow syrup. The syrup was twice redissolved in dry toluene (30 ml) which was removed on a rotary evaporator and concentrated to give the title compound **24b** as a yellow oil, (3.2 g, 93%).H 6.06 (1H, dt, *J* 10.3, < 1, 3-H); 6.02 (1H, ddddd, *J* 17.1, 10.4, 6.3, 5.3, 1, 8-H); 5.85 (1H, ddd, *J* 10.1, 2.7, 2.2, 2-H); 5.37 (1H, dq, *J* 17.2, 1.6, *cis-*9-H); 5.28 (1H, dq, *J* 10.3, 1.3, *trans-*9-H); 5.11 (1H, m, 1-H); 4.33 (1H, ddt, *J* 12.8, 5.4, 1.5, 7a-H); 4.30 (1H, m, 4-H); 4.15 (1H, dddd, *J* 12.8, 6.2, 1.3, 1.3, 7b-H); 3.94 (2H, m, 6-H2); 3.81 (1H, m, 5-H); C (DMSO-*d6*) 135.4 (C, 8-C); 134.7 (CH, 3-C); 125.9 (CH, 2-C); 116.4 (CH2, 9-C); 93.0 (CH, 1-C); 72.6 (CH, 4-C); 68.1 (CH2, 7-C); 62.6 (CH, 5-C); 61.0 (CH2, 6-C); *m/z* (EI+) 186 (M, absent); 129 (25%, M - H2C=CH-CH2O); 126 (45%, M - HOCH2CHO, retro Diels-Alder); 97 (18%); 85 (100%, M - HOCH2CHO - H2C=CH-CH2); 69 (17%, M - HOCH2CHO - H2C=CH-CH2O); 57 (45%, H2C=CH-CH2O); *m/z* (CI+, NH3) 204 (13%, M + NH4, C9H18O4N requires 204.1236, found 204.1236); 188 (15%); 146 (100%); 129 (50%); *v*max (nujol) 3380 (str. br.); 1400, 1370, 1320, 1250, 1190; Rf 0.7 (EtOAc:MeOH, 50:50).

**Prop-2'-enyl 2,3-dideoxy-6-*O*-*tert*-butyldimethylsilyl--D-*erythro*-hex-2-enopyranoside 24c, prop-2'-enyl 2,3-dideoxy-4,6-di-*O*-*tert*-butyldimethylsilyl--D-*erythro*-hex-2-eno­pyr­an­oside 24d and prop-2'-enyl 2,3-dideoxy-6-*O*-acetyl-4-*O*-*tert*-butyl­dimethylsilyl--D-*erythro*-hex-2-enopyranoside 24e**

Prop-2'-enyl 2,3-dideoxy--D-*erythro*-hex-2-enopyranoside **24b** (4.0 g, 21.5 mmol) was dissolved in a solution of dry dichloromethane (150 ml) and triethylamine (3.6 g, 35.6 mmol), cooled under nitrogen to 0°C and treated dropwise with a solution of *tert*-butyldimethylsilyl chloride (3.6g, 23.4 mmol) in dry dichloromethane (100 ml). A reaction temperature of 0-5°C was maintained using an ice bath. On addition of the first drops of solution, white fumes were evolved. The solution was allowed to attain ambient temperature, stirred for 14 hours, evaporated to approximately one third volume, filtered and concentrated to a brown oil. Column chromatography of the crude mixture; eluent hexane to 10% ethyl acetate, afforded the 6-*O*-silyl ether **24c** as a clear oil (1.6g, 25%) and two separate mixtures of starting material **24b** and 6-*O*-silyl ether **24c** and a trace of the 4,6-di-*O*-silyl ether **24d** and 6-*O*-silyl ether **24c**, which were separated by further chromatography to afford a pure sample of the 4,6-di-*O*-silyl ether **24d** as a mixture of anomers (35 mg, 0.4%). In another run a further trace impurity was isolated and identified as **24e** (200 mg, 2.7%). **Spectroscopic data for prop-2'-enyl 2,3-dideoxy-6-*O*-*tert*-butyldimethylsilyl--D-*erythro*-hex-2-enopyran­oside 24c** Combustion analysis C15H28O4Si requires C 60.04 H 9.33 found C 60.28 H 9.48; H 5.88 (2H, m, 3-H, 8-H); 5.69 (1H, dt, *J* 10.2, 2.3, 2-H); 5.24 (1H, dq, *J* 17.2, 1.6, *cis-* 9-H); 5.13 (1H, dd, *J* 10.4, 1.1, *trans-* 9-H); 4.95 (1H, d, *J* 0.5, 1-H); 4.23 (1H, ddt, *J* 12.8, 5.0, 1.5, 7a-H); 4.10 (1H, m, 4-H); 4.02 (1H, dddd, *J* 12.8, 6.4, 1.2, 1.2, 7b-H); 3.81 (1H, m, 6a-H); 3.69 (2H, m, 5-H, 6b-H); 3.1 (1H, d, *J* 3.8, OH); 0.94 (9H, s, 13-H3, 14-H3, 15-H3, (C**H3**)3CSi); 0.09 (6H, s, 10-H3, 11-H3, (C**H3**)2Si); 1H-1H *J*-COSY NMR 1-H to 2-H (weak) to 3-H; 4-H to OH; 4-H to 5-H to 6-Ha? to 6b-H?; 7a-H to 7b-H to 8-H to *cis-* 9-Ha (weak); 7a-H to 8-H to *trans-* 9-H (weak); C 134.4 (CH, 8-C); 133.3 (CH, 3-C); 125.7 (CH, 2-C); 117.1 (CH2, 9-C); 93.2 (CH, 1-C); 71.1 (CH, 4-C); 68.7 (CH2, 7-C); 65.4 (CH, 5-C); 64.4 (CH2, 6-C); 25.8 (3CH3, C-13, C-14, C-15, (**C**H3)3CSi); 18.2 (C, 12-C); -5.5 (2CH3, 10-C, 11-C, (**C**H3)2Si); *m/z* (EI+) 328 (M, C17H32O4Si, absent); 283 (21%, M - OEt); 271 (22%, M - 0CH2-CH=CH2); 241 (27%); 224 (59%); 212 (36%); 169 (31%); 154 (66%, M - tBuMe2SiOCH2CHO, retro Diels-Alder); 125 (45%); 117 (77%, Me2SiOCH2CHO; aldehyde from retro Diels-Alder - tBu); 103 (73%); 97 (100%); 94 (84%); 88 (70%); 85 (59%); 57 (60%); *v*max (nujol) 3380 (br, OH); 1710; 1660; 1245; 1035; Rf 0.55 (hexane:EtOAc, 75:25).

**Spectroscopic data for prop-2'-enyl 4,6-di-*O*-*tert*-butyldimethylsilyl-2,3-dideoxy--D-*erythro*-hex-2-enopyran­oside 24d** Mixture of - and -anomers (ca 50:50). Individual signals of the anomers are designated ' and ''. Undesignated signals are from both anomers. H 5.85 (1H, m, 8-H); 5.77 (1H, d, *J* 10.3, 3-H) 5.62 (1H, dt, *J* 10.2, 2.2, 2-H); 5.22 (1H, d, *J* 17.1, *cis-*9-H); 5.10 (1H, d , *J* 12.5, *trans-*9-H); 5.08 (0.5H, m?, overlaps d at  5.08, -1-H); 4.93 (0.5H, br. s, -1-H); 4.21 (1.5H, m, 7a-H, 4''-H); 4.06 (1.5H, m, 7b-H, 4'-H); 3.72 (2.5H, m, 5'-H, 6-H2); 3.48 (0.5H, ddd, *J* 6.6, 4.4, 4.4, 5''-H); 0.94 (18H, 13-H3, 14-H3, 15-H3, 19-H3, 20-H3, 21-H3, (**C**H3)3CSi); 0.09 (12H, 10-H3, 11-H3, 16-H3, 17-H3, (C**H3**)2Si); 1H-1H *J*-COSY NMR 2-H to 3-H; 4'-H to 5'-H to 6-H2; 4''-H to 5''-H to 6-H2; 7a-H to 7b-H to 8-H to *trans-*9-H to *cis-*9-H (weak) to 8-H to 7a-H; *m/z* (EI+) 414 (M, C21H42O4Si2, absent); 413 (2%, M-H); 357 (44%, M - OEt or M - tBu); 299 (52%, M - tBuMe2Si); 240 (27%, M - tBuMe2SiOCH2CHO, retro Diels-Alder); 225 (51%); 199 (46%); 171 (53%); 147 (81%); 134 (81%); 117 (67%, Me2SiOCH2CHO; aldehyde from retro Diels-Alder - tBu); 97 (83%) 89 (88%);73 (100%); *v*max(CDCl3) 2957; 2930; 2858; 1472; 1391; 1258; 1093; Rf 0.70 (hexane:EtOAc, 75:25).

**Spectroscopic data for prop-2'-enyl 6-*O*-acetyl-2,3-dideoxy-4-*O*-*tert*-butyldimethylsilyl--D-*erythro*-hex-2-enopyran­oside 24e** H 5.93 (1H, m, 8-H); 5.86 (1H, br. d, *J* 10.2, 3-H); 5.70 (1H, ddd, *J* 10.2, 2.3, 2.3, 2-H); 5.28 (1H, dddd, *J* 17.1, 1.5, 1.5, 1.5, *cis-*9-H); 5.18 (1H, dd, *J* 10.3, 1.1, *trans-*9-H); 5.02 (1H, br. s, 1-H); 4.24 (4H, m, 4-H, 6-H2, 7a-H); 4.04 (1H, dddd, *J* 12.7, 6.2, 1.3, 1.3, 7b-H); 3.90 (1H, ddd, *J* 9.1, 4.9, 2.4, 5-H); 2.09 (3H, s, 17-H3); 0.88 (9H, s, 13-H3, 14-H3, 15-H3); 0.10 (3H, s, 10-H3); 0.08 (3H, s, 11-H3); 1H-1H *J*-COSY NMR 1-H to 2-H to 3-H; 5-H to  4.24; 7b-H to *cis-*9-H to 8-H; 8-H to *trans-*9-H; C Absent (C, 16-C, C=O); 134.6 (CH, 3-C, 8-C); 125.9 (CH, 2-C); 117.8 (CH2, 9-C); 94.3 (CH, 1-C); 70.1 (CH, 4-C); 69.6 (CH2, 7-C); 64.5 (CH, 5-C); 63.9 (CH2, 6-C); 26.0 (CH3, 13-C, 14-C, 15-C); 22.5 (CH3, 17-C); 18.3 (C, 12-C); *m/z* (EI+) 342 (absent, M, C17H30O2Si); 285 (43%, M - 0CH2-CH=CH2); 240 (42%, diene from retro Diels-Alder); 225 (61%, M - 0CH2-CH=CH2 - AcOH); 199 (45%, diene from retro Diels-Alder - CH2-CH=CH2); 185 (62%); 117 (79%, Me2SiOCH2CHO; aldehyde from retro Diels-Alder - tBu); 57 (100%); *v*max(CDCl3); 2957; 2931; 2859; 1740 (str. C=O); 1473; 1369; 1255; 1101; 1045; Rf 0.35 (hexane:EtOAc, 75:25).

**Prop-2'-enyl 2,3-dideoxy-4-(prop-2'-ynyl)-6-*tert*-butyl­dimethyl­silyl--D-*erythro*-hex-2-enopyranoside 25, prop-2'-enyl 2,3-dideoxy-4,6-di-*O*-(prop-2'-ynyl)--D-*erythro*-hex-2-enopyranoside 26 and prop-2'-enyl 6-*O*-acetyl-2,3-dideoxy-4-(prop-2'-ynyl)--D-*erythro*-hex-2-enopyranoside**

Prop-2'-enyl 2,3-di­deoxy-6-*O*-*tert*-butyldimethylsilyl--D-*erythro*-hex-2-eno­pyranoside **24c** (500 mg, 1.7 mmol) and sodium hydride (60% suspension in mineral oil, 110 mg ∫ 66 mg, 2.75 mmol, 1.6 equiv.) were dissolved in dry DMF (10 ml) and stirred under nitrogen for 10 minutes. The solution was cooled to 0°C, propargyl bromide (80% solution in toluene, 630 mg ∫ 500 mg, 4.2 mmol, 2.5 equiv.) in dry DMF (15 ml) was added dropwise, and stirred for 16 hours at ambient temperature. TLC analysis indicated presence of starting material. The crude mixture was purified by column chromatography; eluent hexane to 10% ethyl acetate to yield the 4-*O*-propargyl ether **24c** (250 mg, 44%), recovered starting material **24c** (95 mg, 19.0%), a the 4,6-di-*O*-propargyl ether **26** (44 mg, 9%). In one run (prop-2'-enyl)-6-*O*-acetyl-2,3-dideoxy-4-(prop-2'-ynyl)--D-*erythro*-hex-2-enopyranoside(20 mg, 5%) was also isolated. **Spectroscopic data for prop-2'-enyl 2,3-dideoxy-4-(prop-2'-ynyl)-6-*tert*-butyl­dimethylsilyl--D-*erythro*-hex-2-eno­pyr­an­oside 25** Combustion analysis C18H30O4Si requires C 63.91 H 8.86 found C 63.70 H 8.99;H 6.09 (1H, d, *J* 10.2, 3-H); 5.85 (1H, dddd, *J* 16.9, 10.8, 6.0, 5.2, 8-H); 5.69 (1H, dt, *J* 10.1, 2.3, 2-H); 5.22 (1H, ddd, *J* 17.2, 5.8, 1.5, *cis-*9-H); 5.07 (1H, dd, 10.3, 1.3, *trans-*9-H); 4.93 (1H, t, *J* 1.6, 1-H); 4.15 (3H, m, 6-H2, 7a-H); 4.11 (1H, m, 4-H); 3.96 (1H, dd, *J* 12.8, 6.4, 7b-H); 3.75 (3H, m, 5-H, 10-H2); 2.33 (1H, t, *J* 2.3, 12-H); 0.86 (9H, s, 16-H3, 17-H3, 18-H3, (C**H3**)3CSi); 0.09 (6H, s, 13-H3, 14-H3, (C**H3**)2Si); C 134.5 (CH, 8-C); 130.4 (CH, 3-C); 127.0 (CH, 2-C); 117.2 (CH2, 9-C); 93.5 (CH, 1-C); 79.9 (C, 11-C); 74.5 (CH, 12-C); 70.6 (CH, 4-C); 70.3 (CH, 5-C); 68.9 (CH2, 7-C); 62.9 (CH2, 6-C); 56.5 (CH2, 10-C); 26.1 (3CH3, 16-C, 17-C, 18-C, (**C**H3)3CSi); 18.2 (C, 15-C); -5.5 (2CH3, 13-C, 14-C, (**C**H3)2Si); *m/z* (EI+) 338 (M, absent); 281 (36%, M - H2C=CHCH2O); 225 (22%, M- HC∫CCH2O - H2C=CHCH2O); 223 (41%, M - HC∫CH2OH - H2C=CHCH2OH or M - tBuMe2+); 164 (53%, M - tBuMe2SiOCH2CHO, retro Diels-Alder); 123 (46%, M - retro Diels-Alder - H2C=CHCH2+); 117 (53%, Me2SiOCH2CHO; aldehyde from retro Diels-Alder - tBu); 101 (46%); 89 (83%); 81 (88%); 73 (100%); 59 (100%); 57 (73%, M - 269, C3H7O); *v*max (nujol) 3280 (C**∫C-H**); 2100 (weak, C**∫**C); 1650 (br); 1250; 1085; 830; Rf 0.85 (hexane:EtOAc, 75:25).

**Spectroscopic data for prop-2'-enyl 2,3-dideoxy-4,6-di-*O*-(prop-2'-ynyl)--D-*erythro*-hex-2-enopyranoside 26** H 6.04 (1H, d, *J* 10.2, 3-H); 5.86 (1H, ddd, *J* 17.2, 10.3, 6.3, 5.1, 8-H); 5.71 (1H, dt, *J* 10.3, 2.3, 2-H); 5.23 (1H, ddd, *J* 17.2, 1.6, 9a-H); 5.12 (1H, dd, *J* 10.3, 1.1, 9b-H); 4.98 (1H, br s, 1-H); 4.20 (6H, m, 4-H, 7a-H, 10-H2, 13-H2); 3.99 (1H, dd, *J* 12.9, 6.3, 7b-H); 3.85 (1H, ddd, *J* 9.3, 3.8, 1.9, 5-H); 3.79 (1H, dd, *J* 10.5, 4.0, 6a-H); 3.69 (1H, dd, *J* 10.5, 2.0, 6b-H); 2.38 (2H, m, 12-H, 15-H); 1H-1H *J*-COSY NMR 1-H to 2-H to 3-H; 4-H to 5-H to 6a-H to 6b-H; 5-H to 6b-H; 7a-H to 7b-H to 8-H to 9a-H to 9b-H (weak); 8-H to 9b-H; 10a-H to 10b-H to 12-H; 10a-H to 12-H; 13-H to 15a-H to 15b-H; 13-H to 15b-H; C 134.8 (CH, 8-C); 130.9 (CH, 3-C); 127.0 (CH, 2-C); 117.1 (CH2, 9-C); 94.2 (CH, 1-C); 75.2, 75.0 (2CH, 12-C, 15-C); 70.5 (CH, 4-C); 69.5 (CH2, 10-C or 13-C); 69.2 (CH, 5-C); 68.7 (CH2, 10-C or 13-C); 59.1 (CH2, 7-C); 57.2 (CH2, 6-C); *m/z* (EI+) 262 (M, C15H18O4, absent); 261 (2%, M-1); 207 (8%, M - C3H30); 205 (56%, M- C3H5O); 166 (31%, M- C3H3 - C3H5O or M - C3H5 - C3H3O); 164 (79%, M - HC∫C-CH2OCH2-CHO, M - retro Diels-Alder); 135 (41%); 125 (72%, M - HC∫C-CH2OCH2-CHO - C3H3); 123 (73%, M - HC∫C-CH2OCH2-CHO - C3H5); 97 (50%); 95 (63%); 85 (70%); 83 (78%); 81 (82%); 77 (75%); 69 (83%); 67 (85%); 65 (78%); 55 (100%); *v*max(CDCl3) 3308 (C∫**C-H**); 3020; 2931; 2160 (weak, C∫C); 1219; 1084; 1049.

**Spectroscopic data for prop-2'-enyl 6-*O*-acetyl-2,3-dideoxy-4-(prop-2'-ynyl)--D-*erythro*-hex-2-enopyranoside** Combustion analysis; C14H18O6 requires C 59.57, H 6.43; found 59.62, H 6.46; H 5.98 (1H, d, *J* 10.2, 3-H); 5.83 (1H, m, 8-H); 5.71 (1H, dt, *J*, 10.3, 1.5, 2-H); 5.17 (1H, dd, *J* 18.8, 1.5, *cis-*9-H); 5.07 (1H, dd, *J* 10.4, 1.2, *trans-*9-H); 4.94 (1H, br s, 1-H); 4.22 (2H, m, 6-H2); 4.14 (3H, m, 7a-H, 10-H2); 4.03 (1H, dd, *J* 9.5, 1.3, 4-H); 3.95 (1H, dd, *J* 12.8, 6.4, 7b-H); 3.89 (1H, dt, *J* 9.4, 4.0, 5-H); 2.33 (1H, t, *J* 2.3, 12-H); 2.00 (3H, s, CH3CO); 1H-1H *J*-COSY NMR 1-H to 2-H to 3-H to 4-H (very weak) to 5-H to 6-H2; 1H to 3-H (very weak); 7a-H to 7b-H to 8-H; 7a-H to 8-H to *cis-9*-H to *trans-*9-H; 8-H to *trans-*9-H; C 171.3 (CO, C-13); 134.6 (CH, 8-C); 130.0 (CH, 3-C); 127.3 (CH, 2-C) 117.8 (CH2, 9-C); 94.1 (CH, 1-C); 79.8 (C, 11-C); 75.2 (CH, 12-C); 70.3 (CH, 4-C); 69.5 (CH2, 10-C); 68.0 (CH, 5-C); 63.9 (CH2, 7-C); 56.7 (CH2, 6-C); 21.4 (CH3, 14-C);*m/z* (EI+) 266 (M, C14H18O5, absent); 265 (4%, M-1); 213 (28%); 209 (69%, M-C3H3O); 168 (32%); 164 (93%, M- AcO-CH2-CHO, M- retro Diels-Alder); 149 (86%); 125 (83%, M - AcO-CH2-CHO - C3H3); 123 (88%, M - AcO-CH2-CHO - C3H5); 111 (53%); 97 (81%); 95 (85%); 83 (93%); 81 (100%); 67 (94%); 55 (98%); *v*max(CDCl3) 3305; 2916; 2110 (weak, C∫C); 1740.

**Preparation of [4a*S*-(4a,6a,8,8a,8b,8c)]-(1,1-dimethyl­ethyl)­[(4,4a,5,6a,8,8a,8b,8c-octahydro-2*H*-difuro[2,3,4-*de*:4',3',2'-*ij]*[2]ben­zo­pyran-8-yl)methoxy]dimethylsilane 27a and [2a*R*-(2a,3a,5a,7, 7a,7b,7c)]-(1,1-dimethylethyl)[[octahydro-2a-[(tri-*n*-butyl­stann­yl)­methyl]-2*H*,3*H*-1,5,6-trioxacyclopent[*jkl*]-*as*-indacenyl-7-yl]meth­oxy]­dimethylsilane 28a**.

Prop-2'-enyl 2,3-dideoxy-4-(prop-2'-ynyl)-6-tert-butyl­dimethyl­silyl--D-*erythro*-hex-2-eno­pyr­anoside **25** (80 mg, 0.24 mmol) was dissolved in dry toluene (3 ml) and warmed steadily to reflux. AIBN (2 mg, 0.011 mmol, 0.5 equiv.) was added portion wise. A solution of tri-*n*-butyltin hydride (110 mg, 0.37 mmol, 1.5 equiv.) in dry toluene (2 ml) was added dropwise over 3 hours *via* a syringe pump. The reaction solution was then refluxed for 14 hours. TLC analysis indicated a complex mixture of products, including starting material. Further portions of AIBN (2 mg, every 4 hrs), and a second tri-*n*-butyltin hydride solution (110 mg, 0.03 mmol, 1.5 equiv.) in dry toluene (2 ml) was added over 6 hours and the solution refluxed for 18 hours. Purification by flash column chromatography, eluent hexane to 10% diethyl ether afforded the title compounds **27a** (15 mg, 18%) and **28a** (12 mg, 8%) both as clear oils and a mixture of products, including starting material **25** (24 mg, 19%). **Spectroscopic data for [4a*S*-(4a,6a,8,8a,8b,8c)]-(1,1-dimethyl­ethyl)­[(4,4a,5,6a,8,8a,8b,8c-octahydro-2*H*-difuro[2,3,4-*de*:4',3',2'-*ij]*[2]ben­zo­pyran-8-yl)meth­oxy]dimethylsilane 27a** C18H30O4Si requires C 63.81, H 8.86; found C 63.68, H 8.90; H 5.93 (1H, dd, *J* 8.3, 1.4, 13-H); 5.40 (1H, d, *J* 6.0, 1-H); 4.20 (1H, br. d, *J* 10.0, 11a-H); 4.16 (1H, d, *J* 10.0, 11b-H); 4.14 (1H, t, *J* 9.9, 4-H); 3.97 (1H, dd, *J* 7.4, 6.0, *endo-*8-H); 3.83 (1H, dd, *J* 11.5, 2.0, 15a-H); 3.72 (1H, dd, *J* 11.5, 3.7, 15b-H); 3.51 (1H, ddd, *J* 9.8, 3.6, 1.9, 3-H); 3.27 (1H, dd, *J* 10.8, 7.6, *exo*-8-H); 2.94 (1H, br. dd, *J* 9.7, 9.7, 5-H); 2.36 (1H, dd, *J* 12.2, 7.9, *endo*-14-H); 2.14 (1H, ddd, *J* 12.6, 10.0, 6.4, 6-H); 1.88 (2H, m, 7-H, *exo*-14-H); 0.88 (9H, s, 19-H3, 20-H3, 21-H3, (C**H3**)3CSi); 0.04 (6H, s, 16-H3, 17-H3, (C**H3**)2Si); 1H-1H *J*-COSY NMR 1-H to 6-H to 5-H to 4-H to 3-H to 15a-H (weak) to 15b-H; 3-H to 15b-H (very weak); 6-H to 7-H (weak) to *endo*-8-H to *exo*-8-H to 7-H to *endo*-14-H to *exo*-14-H; 11a-H to 11b-H; 13-H to *endo*-14-H; 1H-1H decouplings, irradiation  5.93 (13-H); changes 2.94 (1H, t, *J* 9.7, 5-H); 2.36 (1H, d, *J* 12.2, *endo*-14-H); irradiation 3.279 (*exo*-8-H); changes 4.14 (1H, dd, *J* 9.0, 6.2, 4-H, spillage?); 3.97 (1H, t, *J* 4.00, *endo-*8-H); irradiation  2.357 (*endo*-14-H); changes 5.93 (s, 13-H); 2.94 (br. d, *J* 9.3, 5-H, spillage?); 2.14 not visible (6-H); 1.88 (sharpened m, 7-H, *exo*-14-H); irradiation 2.143 (6-H); changes 5.40 (s, 1-H); 2.94 (m, 5-H), 2.36 (1H, d, *J* 5.9, *endo*-14-H); 1.88 (sharpened m, 7-H, *exo*-14-H); 1H-1H-pseudo-INDOR. Two series of irradiations were performed. In the first experiment the four lines of *exo*-8-H ( 3.24) were irradiated. The peak separations for the signal for *endo*-8-H at  3.88 were 7.7, 7.6, 7.7 and 7.6 Hz. The peak separations for the signals for 7-H were 8.6, 9.9, 8.5, 11.2 Hz. The broad range of values is due to the poor signal to noise ratio of the spectra. In the second experiment the four lines of the signal for *endo*-14-H (2.39) were irradiated. The peak separations for the signals for *exo*-14-H were 13.9, 12.0, 11.5, 11.5 Hz. Again the broad range of values is due to the poor signal to noise ratio of the spectra.

| Table 2. 1H-NMR coupling constants correlation **27a** (CDCl3) | | | | | | |
| --- | --- | --- | --- | --- | --- | --- |
| Signal | Coupling constants | | | | | |
| 1-H |  |  |  |  | 6.0 |  |
| 6-H |  | 12.6 |  | 10.0 | 6.4 |  |
| 5-H |  |  |  | 9.7 |  | 9.7 |
| 4-H |  |  | 9.9 |  |  | 9.9 |
| 3-H |  |  | 10.0 | 3.3 | 1.9 |  |
| 15a-H | 11.5 |  |  |  | 1.6 |  |
| 15b-H | 11.5 |  |  | 3.6 |  |  |
| *endo*-8-H |  |  | 7.4 |  |  | 6.0 |
| *exo*-8-H | 10.7 |  | 7.7 |  |  |  |
| 7-H | ? | ? | ? |  |  | ? |
| *endo*-14-H |  |  |  | 12.3 | 8.0 |  |
| *exo*-14-H |  |  | ? | ? |  | ? |
| 13-H |  |  |  |  | 8.3 | 1.4 |
| 11a-H | 10.0 |  |  |  |  |  |
| 11b-H | 10.0 |  |  |  |  |  |

| Table 3. PC-Model simulation of non-bonded distances | | |
| --- | --- | --- |
|  | *trans-*6,7-**27b** | *cis-*6,7-**29b** |
|  | distance, Å | distance, Å |
| 3-H to *endo*-14-H | 4.47 | 3.34 |
| 3-H to *exo*-14-H | 4.82 | 4.56 |
| 3-H to 7-H | **2.1** | 4.63 |
| 7-H to *endo*-8-H | 2.41 | 2.78 |
| 7-H to *exo*-8-H | 3.07 | 2.44 |
| 7-H to *endo*-14-H | 2.49 | 2.99 |

| Table 4. 1H-1H nOe experiments for **27a** | | | | | | |  |
| --- | --- | --- | --- | --- | --- | --- | --- |
|  | Signal irradiated | | | | | | |
| % nOe | 1-H | 6-H | 5-H | 3-H | *exo*-8-H | *endo*-14-H | |
| 1-H |  | 13 |  |  |  |  | |
| 6-H | 10 |  | 9 |  | 6 |  | |
| 5-H |  | 9 |  |  |  |  | |
| 4-H |  |  | 15 |  |  |  | |
| 15a-H |  |  |  | 4 |  |  | |
| 15b-H |  |  |  | 4 |  |  | |
| *endo*-8-H |  |  |  |  | 28 |  | |
| *exo*-8-H |  | 5 |  |  |  |  | |
| 7-H, *exo*-14-H |  | 0 |  | 21 | 0 | 33 | |
| 13-H |  |  |  |  |  | 10 | |

C 141.0 (C, 12-C); 123.1 (CH, 13-C); 97.6 (CH, 1-C); 73.8 (CH, 3-C); 71.1 (CH, 4-C); 69.9 (CH2, 8-C); 69.2 (CH2, 11-C); 63.2 (CH2, 15-C); 43.8, 43.6 (2CH, 6-C, 7-C); 35.3 (CH, 5-C); 26.4 (CH3, 19-C, 20-C, 21-C, (**C**H3)3CSi); 26.2 (CH2, 14-C); 19.0 (C, 18-C); all assignments of carbons bearing protons were confirmed by a 13C-1H COSY experiment; *m/z* (EI+) 339 (2%, C18H30O4Si, M); 283 (16%); 281 (56%, M - tBuH); 165 (54%); 135 (58%); 133 (63%); 117 (69%); 105 (68%); 91 (92%); 75 (100%); 73 (96%); 57 (75%); *v*max(CDCl3) 2975; 2969; 2958, 1444; 1153; Rf 0.15 (hexane:Et2O, 50:50). **Spectroscopic data for [2a*R*-(2a,3a,5a,7, 7a,7b,7c)]-(1,1-dimethylethyl)[[octahydro-2a-[(tri-*n*-butyl­stann­yl)­methyl]-2*H*,3*H*-1,5,6-trioxacyclopent[*jkl*]-*as*-indacenyl-7-yl]meth­oxy]­dimethylsilane 28a** Combustion analysis; C30H56O4SiSn requires C 57.42, H 9.00; found C 57.69, H 9.20; H 5.37 (1H, d, *J* 7.0, 1-H); 3.76 (6H, m, 3-H, 4-H, 8-H2, 14-H2); 3.60 (1H, d, *J* 8.5, *endo-*11-H); 3.21 (1H, d, *J* 8.5, *exo-*11-H); 2.98 (1H, m, 7-H); 2.85 (1H, ddd, *J* 10.1, 10.1, 7.1, 6-H); 2.21 (1H, dd, *J* 9.8, 9.8, 5-H); 1.58 (2H, m, 13-H2); 1.38 (6H, m, 24-H6, Sn(CH2)2C**H2**); 1.22 (7H, m, 15a-H, 23-H6, SnCH2C**H2**); 0.95 (1H, d, *J* 13.1, 15b-H); 0.83 (9H, s, 19-H3, 20-H3, 21-H3, (C**H3**)3CSi); 0.80 (9H, 25-H9, Sn(CH2)3C**H3**); 0.77 (6H, m, 22-H6, SnC**H2**); 0.28 (6H, s, s, 16-H3, 17-H3, (C**H3**)2Si); 1H-1H *J*-COSY NMR 1-H to 6-H to 5-H to 4-H; 6-H to 7-H to 13-H2; *endo-*11-Hto *exo-*11-H; 7-H to 8-H2; 15a-H to 15b-H; 22H6 to 23-H6 to 24-H6 to 25-H9); H(C6D6) 5.57 (1H, d, *J* 7.3, 1-H); 4.27 (1H, dd, *J* 9.9, 8.6, 4-H); 4.23 (1H, dd, *J* 11.1, 1.9, 14a-H); 4.15 (1H, m, 3-H); 4.06 (1H, dd, *J* 11.1, 4.7, 14b-H); 3.84 (1H, d, *J* 8.4, *endo-*11-H); 3.76 (1H, dd, *J* 9.0, 1.9, *endo-*8-H); 3.59 (1H, dd *J* 9.0, 6.4, *exo*-8-H); 3.43 (1H, d, *J* 8.4, *exo*-11-H); 2.65 (2H, m, 6-H, 7-H); 2.20 (1H, dd, *J* 9.8, 9.8, 5-H); 1.65 (1H, m, 13a-H); 1.62 (7H, m, 13b-H, 24-H6, Sn(CH2)2C**H2**); 1.47 (6H, m, 23-H6, SnCH2C**H2**); 1.24 (1H, d, *J* 8.4, 15a-H); 1.15 (9H, s, 19-H3, 20-H3, 21-H3, (C**H3**)3CSi); 1.06 (9H, 25-H9, Sn(CH2)3C**H3**); 0.97 (7H, 15b-H, 22-H6, C**H**2SnC**H2**); 0.29, 0.27 (6H, s, s, 16-H3, 17-H3, (C**H3**)2Si); 1H-1H *J*-COSY NMR (C6D6) 1-H to 6-H to 5-H to 4-H to 3-H; *endo-* 11-H to *exo*-11-H; 13a-H to 13b-H to 7-H to *endo* -8-H (very weak) to *exo*-8-H; C 100.3 (CH, 1-C); 76.6 (CH2, 11-C); 73.3 (CH, 3-C or 4-C); 72.2 (CH, 3-C or 4-C); 71.0 (CH2, 14-C); 65.1 (CH2, 8-C); 52.7 (CH, 5-C); 46.1 (CH, 7-C); 44.9 (CH2, 13-C); 44.5 (CH, 6-C); 29.6 (CH2, 3*J*Sn,C -20.0, 24-C, Sn(CH2)2**C**H2); 27.9 (CH2, 2*J*Sn,C -56, 23-C, SnCH2**C**H2); 26.4 (3CH3, 19-C, 20-C, 21-C, (**C**H3)3CSi); 22.3 (C, 12-C); 19.8 (CH2, 15-C); 14.1 (CH3, 25-C, Sn(CH2)3**C**H3); 10.2 (CH2, 22-C, 1*J*119Sn,C -316, 1*J*117Sn,C -330, Sn**C**H2); -5.0 (16-C, 17-C, (**C**H3)2Si); 13C-1H *J*-COSY NMR H to C 5.37 to 100.3 (CH, 1-C); 3.76 to 73.3 (CH, 3-C or 4-C), 72.2 (CH, 3-C or 4-C), 71.0 (CH2, 14-C), 65.1 (CH2, 8-C); 3.60 and 3.21 to 76.6 (11-C); 2.98 to 46.1 (7-C); 2.85 to 44.5 (6-C); 2.21 to 52.7 (CH, 5-C); 1.58 to 44.9 (13-C); 1.38 to 29.6 (24-C, Sn(CH2)2**C**H2); 1.22 to 27.9 (23-C, SnCH2**C**H2); 1.22 and 0.95 to 19.8 (15-C); 0.83 to 26.4 (19-C, 20-C, 21-C, (**C**H3)3CSi); 0.80 to 14.1 (CH3, 25-C, Sn(CH2)3**C**H3); 0.77 to 10.2 (22-C); 0.2 to -5.0 (16-C, 17-C, (**C**H3)2Si); *m/z* (EI+) 630 (1%, C18H30O4Si, M); 573 (32%, tin cluster, M - tBu); 291 (35%, tin cluster, Bu3SnH); 233 (45%, tin cluster); 177 (71%, tin cluster); 117 (44%, tin cluster); 91 (56%); 75 (98%); 73 (86%); 57 (100%); *v*max (CDCl3) 2957; 1440; 1260; 1080; Rf 0.55 (hexane:Et2O).

| Table 5. 1H-NMR coupling constant correlations **43** (CDCl3) | | | | |
| --- | --- | --- | --- | --- |
| Signal | Coupling constants | | | |
| 14-H | 6.0 |  |  |  |
| 2-H | 6.2 | 8.2 |  |  |
| 1-H |  | 8.3 | 7.1 |  |
| 6-H (multiplet) |  | ? | ? | ? |
| 5a-H | 14.3 |  | 5.7 | 5.7 |
| 5b-H | 14.3 | 10.3 |  | 6.4 |
| 4-H |  |  | 6.0 | 6.0 |

**Prop-2'-ynyl 4-(prop-2'-ynyl)-2,3-dideoxy-6-*O*-*tert-*butyl­di­methyl­silyl--D-*erythro*-hex-2-enopyranoside 46a**

Prop-2'-ynyl 2,3-di­deoxy-6-*O*-*tert*-butyldimethylsilyl--D-*erythro*-hex-2-enopyranoside **14a** (2.0 g, 6.71 mmol) was dissolved in dry DMF (6 ml) and treated with sodium hydride (60% suspension in mineral oil, 430 mg ∫ 258 mg, 10.4 mmol, 1.6 equiv.) under nitrogen and cooled to 0∞C. Propargyl bromide (80% solution in toluene, 2.0 g ∫ 1.6 g, 13.4 mmol, 2.0 equiv.) in dry DMF was added dropwise at a rate to maintain the temperature at 5∞C. The solution was stirred under nitrogen for 18 hours. TLC analysis indicated a complex mixture of products. Purification by flash column chromatography, eluent hexane to 10% ethyl acetate afforded the title compound **46a** (260 mg, 11.5%), starting material **14a** (320 mg, 16%) and unresolved mixture (420 mg, circa 70:30), all as amber oils. H 6.09 (1H, d, *J* 10.3, 3-H); 5.67 (1H, ddd, *J* 10.3, 2.3, 2.3, 2-H); 5.49 (1H, d, *J* 3.5, 1-H); 4.67 (1H, dd, *J* 5.5, 2.7, 5-H); 4.53 (1H, dd, *J* 12.0, 2.7, 6a-H); 4.45 (1H, dd, *J* 12.0, 5.5, 6b-H); 4.38 (2H, d, *J* 2.4, 7-H2); 4.05 (1H, dd, *J* 9.1, 1.3, 4-H); 2.51 (2H, app. t, *J* 2.4, 9-H, 12-H); 1.19 (9H, s, 16-H3, 17-H3, 18-H3); C 131.2 (CH, 3-C); 126.6 (CH, 2-C); 92.8 (CH, 1-C); 80.1 (CH, 8-C or 11-C); 79.9 (CH, 11-C or 8-C); 75.0 (CH, 9-C or 12-C); 74.8 (CH, 12-C or 9-C); 71.1 (CH, 4-C); 70.4 (CH, 5-C); 63.2 (CH2, 6-C); 56.6 (CH2, 10-C or 7-C); 54.8 (CH2, 7-C or 10-C); 26.3 (3CH3, 16-C, 17-C, 18-C); 18.8 (C, 15-C); -5.4 (2CH3, 13-C, 14-C); *m/z* (EI+) 336 (absent, C18H28O4Si); 281 (24%, M - HC∫CH2O); 223 (35%, M - HC∫CH2OH - HC∫CH2O); 162 (26%, M - retro Diels-Alder); 149 (26%); 118 (30%); 117 (100%, Me2SiOCH2CHO; aldehyde from retro Diels-Alder - tBu); 89 (71%); 75 (64%, (CH3)2Si=O+H); 73 (78%, C4H9O+); 57 (55%, C3H5O+); *v*max (nujol) 3290; 2900 (str.); 2100 (weak); 1455;Rf 0.65 (hexane:EtOAc, 75:25).

**Prop-2'-ynyl 2,3-dideoxy-6-*O*-pivaloyl-4-*O*-(prop-2'-ynyl)--D-*erythro*-hex-2-enopyranoside 46b and prop-2'-ynyl 2,3-dideoxy-4,6-di-*O*-(prop-2'-ynyl)--D-*erythro*-hex-2-enopyranoside 48**

Prop-2'-ynyl 2,3-dideoxy-6-*O*-pival­oyl--D-*erythro*-hex-2-enopyranoside **14a** (0.5 g, 1.9 mmol) was dissolved in dry DMF (8 ml) and treated with sodium hydride (60% suspension in mineral oil, 125 mg ∫ 75 mg, 3.0 mmol, 1.6 equiv.) under nitrogen. Propargyl bromide (80% solution in toluene, 560 mg ∫450 mg, 3.8 mmol, 2.0 equiv.) was added dropwise to maintain a reaction solution temperature of 5°C and then stirred under nitrogen for 14 hours. TLC analysis indicated complex mixture of products. Crude products were separated by column chromatography; eluent hexane to 25% ethyl acetate to yield the 4-*O*-(prop-2'-ynyl)-compound **46b** (240 mg, 41.4%) as a clear oil, the 4,6-di-*O*-(prop-2'-ynyl)-compound **48** (110 mg, 19%) and starting material **14a** (60 mg, 10.3%); **Spectroscopic data for prop-2'-ynyl 2,3-dideoxy-6-*O*-pivaloyl-4-*O*-(prop-2'-ynyl)--D-*erythro*-hex-2-enopyrano­side 46b** H 6.12 (1H, d, *J* 10.2, 3-H); 5.81 (1H, dt, *J* 10.1, 2.4, 2-H); 5.19 (1H, s, 1-H); 4.41 (1H, dd, *J* 12.2, 5.1, 4-H); 4.28 (4H, m, 7-H2, 10-H2); 4.01 (1H, m, 5-H); 3.97 (2H, m, 6-H2); 2.45 (2H, t, *J* 2.4, 9-H, 12-H); 1.24 (9H, s, 15-H3, 16-H3, 17-H3, C(C**H3**)3); C 178.7 (C, 13-C, C=O); 130.6 (CH, 2-C); 126.9 (CH, 3-C); 92.7 (CH, 1-C); 79.7 (C, 8-C or C-11); 79.6 (C, 11-C or 8-C) 75.4 (CH, 9-C or 12-C); 75.1 (CH, 12-C or 9-C); 70.5 (CH, 4-C); 68.6 (CH, 5-C); 64.0 (CH2, 6-C); 56.8 (CH2, 10-C); 55.0 (CH2, 7-C); 39.2 (C, 14-C); 27.6 (3CH3, 15-C, 16-C, 17C, C(**C**H3)**3**); *m/z* (EI+) 306 (absent, M, C17H22O5); 251 (12%, M - OCH2-C∫CH); 176 (21%); 163 (35%); 162 (100%, diene from retro Diels-Alder); 149 (43%); 124 (35%); 123 (92%, diene from retro Diels-Alder - CH2-C∫CH); 95 (61%); 83 (56%); 57 (89%); *v*max (neat) 3450(br); 3290 (str., C∫**C-H**); 2960-2860; 2110 (weak, C**∫**C); 1730 (str., C=O);Rf 0.90 (hexane:EtOAc).

**Spectroscopic data for (prop-2'-ynyl) 2,3-dideoxy-4,6-di-*O*-(prop-2'-ynyl)--D-*erythro*-hex-2-enopyranoside 48** Combustion analysis C15H16O4 requires C 69.23 H 6.15 found C 68.96 H 6.22; H 6.07 (1H, d, *J* 10.2, 3-H); 5.71 (1H, ddd, *J* 10.1, 2.4, 2.4, 2-H); 5.15 (1H, br. s, 1-H); 4.20 (7H, m, 4-H, 7-H2, 10-H2, 13-H2); 3.83 (1H, m, 5-H); 3.77 (1H, dd, *J* 10.4, 4.0, 6a-H); 3.70 (1H, dd, *J* 10.4, 2.0, 6b-H); 2.38 (2H, m, 9-H, 12-H); 2.36 (1H, t, *J* 2.4, 15-H); 1H-1H *J*-COSY NMR 1-H to 2-H (very weak) to 3-H; 4-H to 5-H to 6a-H to 6b-H to 5-H; 7-H2 to 9-H; 10-H2 to 12-H; 13H2 to 15-HC 132.6 (CH, 2-C); 127.1 (CH, 3-C); 94.6 (CH, 1-C); 81.4, 81.05 81.0 (3C, C-8, 11-C, 14-C); 76.4, 76.3, 76.2 (3CH, 9-C, 12-C, 15-C); 71.6 (CH, C-4); 70.8 (CH, C-5); 69.9 (CH2, 6-C); 60.3, 58.5, 56.6 (3CH2, 7-C, 10-C; 13-C); *m/z* (EI+) 260 (M, C15H16O4, absent); 205 (23%, M- HC∫C-CH2O); 162 (84%, diene from retro Diels-Alder, M - HC∫C-CH2O-CH2-CHO); 123 (88%, M - HC∫CCH2OCH2CHO - HC∫C-CH2); 95 (79%); 81 (44%); 67 (100%); 55 (61%); *v*max(CDCl3) 3308 (str., C∫**C-H**); 2910; 2120 (weak, C**∫**C); 1094; 1045; Rf 0.65 (hexane:EtOAc).

**Attempted preparation of [6a*S*-(6a,8,8a,8b,8c)]-(1,1-dimethyl­ethyl)­[(5,6a,8,8a,8b,8c-hexahydro-2*H*-difuro[2,3,4-*de*:4',3',2'-*ij]*[2]­ben­zo­pyran-8-yl)­methoxy]dimethylsilane 49a**

Prop-2'-ynyl 4-(prop-2'-ynyl)-2,3-dideoxy-6-*O*-*tert-*butyl­di­methyl­silyl--D-*erythro*-hex-2-enopyranoside **46a** (80 mg, 0.23 mmol) was dissolved in dry toluene and warmed to reflux under nitrogen. AIBN (2 mg, 0.01 mmol, 0.04 equiv.) was added and the solution refluxed for a further 15 mins. A solution of tri-*n*-butyltin hydride (105 mg, 0.4 mmol, 1.5 equiv.) in dry toluene (3 ml) was added dropwise from a syringe pump. The solution was allowed to reflux for a further 16 hours, TLC analysis indicated the expected mixture of products. Repeated attempts to purify by column chromatography, eluent hexane to 20% ethyl acetate, gave one of the major products **50a** (5 mg, 6%) plus a trace impurity. **Spectoscopic data for [6a*S*-(6a,8,8a,8b,8c)]-(1,1-dimethyl­ethyl)­[(5,6a,8,8a,8b,8c-hexahydro-2*H*-difuro[2,3,4-*de*:4',3',2'-*ij]*[2]­ben­zo­pyran-8-yl)­methoxy]­dimethyl­silane 50a** H5.75 (1H, dd, *J* 10.1, 2.7, 13-H or 14-H); 5.47 (1H, d, *J* 7.0, 1-H); 5.34 (1H, dd, *J* 10.0, 2.1, 13-H or 14-H); 4.06 (1H, d *J* 8.5, 8-H or 11-H); 3.90 (1H, d, *J* 8.5, 8-H or 11-H); 3.79 (1H, dd, *J* 11.5, 1.9, 4-H); 3.70 (3H, m, 8-H or 11-H, 15-H2); 3.52 (1H, d, *J* 8.6, 8-H or 11-H); 3.24 (1H, ddd, *J* 9.9, 2.9, 2.9, 3-H); 2.92 (1H, ddd, *J* 11.1, 11.1, 7.1, 6-H); 2.80 (1H, m, 7-H?); 2.67 (1H, t, *J* 10.2, 5-H); 1.41 (6H, m, 24-H6, Sn(CH2)2-C**H2**); 1.24 (12H, m, 22-H6, 23-H6, SnC**H2**-C**H2**); 0.82 (18H, m, 19-H3, 20-H3, 21-H3, 25-H9, SitBu, Sn(CH2)3C**H3**); 0.1 (6H, m, SiMe2, 16-H3, 17-H3).

**Attempted preparation of [6a*S*-(6a,8,8a,8b,8c)]­[(5,6a,8,8a,8b,8c-hexahydro-2*H*-difuro[2,3,4-*de*:4',3',2'-*ij]*[2]­ben­zo­pyran-8-yl)­methoxy]-2,2-dimethylpropanoate 49b**

Prop-2'-ynyl 2,3-dideoxy-6-*O*-pivaloyl-4-*O*-(prop-2'-ynyl)--D-*erythro*-hex-2-enopyranoside **46b** (200 mg, 0.69 mmol) and AIBN (7 mg, 0.03 mmol, 0.04 equiv.) were dissolved in dry toluene (3 ml) and warmed to reflux under nitrogen. A solution of tri-*n*-butyltin hydride (300 mg, 1.01 mmol, 1.5 equiv.) was added dropwise from a syringe pump over 3 hours. The reaction was refluxed for 20 hours. TLC analysis indicated a very complicated mixture of products. Purification by repeated column chromatography, eluent hexane to 10% ethyl acetate, gave one predominantly clean product **50b** (25 mg, 6% yield). H5.85 (1H, dd, *J* 10.0, 2.9, 14-H); 5.50 (1H, d, *J* 7.0, 1-H); 5.44 (1H, dd, *J* 9.9, 1.6, 13-H); 4.30 (1H, d *J* 11.8, 15a-H); 4.12 (1H, dd, *J* 8.6, 8.6, 11a-H); 4.08 (1H, dd, *J* 11.9, 6.1, 15b-H); 3.98 (1H, d, 8.6, 11b-H); 3.58 (4H, 4-H, 5-H, 8-H2); 3.05 (1H, ddd, *J* 11.0, 11.0, 7.1, 6-H); 2.80 (2H, m, 5-H, 7-H); 1.48 (6H, m, 23-H6, Sn(CH2)2-C**H2**); 1.34 (6H, m, 22-H6 SnCH2-C**H2**); 1.12 (9H, s, 18-H3, 19-H3, 20-H3, C(C**H3**)3); 0.95 (15H, 21-H6, 24-H9, SnC**H2**(CH2)2C**H3**)

**Tabular Spectroscopic Data for 53a and Intranuclear Distances from Molecular Modelling Studies for 53b**

| Table 6. 1H-NMR coupling constants correlation for **53a** in CDCl3 (and C6D6). | | | | | | | | | | |
| --- | --- | --- | --- | --- | --- | --- | --- | --- | --- | --- |
| Signal | CDCl3 | Coupling constants | | | | | | | |  |
| 1-H | 5.50, d | 7.1 (6.7) |  |  |  |  |  |  |  | |
| 6-H | 3.01, ddd | 7.1 (6.8) | 11.5 (10.9) | 10.6 (10.9) |  |  |  |  |  | |
| 5-H | 2.69, dd |  |  | ? (10.4) | ? (9.7) |  |  |  |  | |
| 4-H | 3.36, dd |  |  |  | ? (9.7) | ? (9.7) |  |  |  | |
| 3-H | 3.36, dq ? | ? (?) |  |  |  | ? (?) |  |  |  | |
| 15-H3 | 1.12, d | *J* ca. 6 (6.0) |  |  |  |  |  |  |  | |
| 7-H | 2.69 ddddd? |  | ? (?) | ? (?) | ? (?) |  | ? (?) | ? (?) |  | |
| 8a-H | 4.12, dd | 8.6 (8.5) |  | 8.6 (8.5) |  |  |  |  |  | |
| 8b-H | 3.67, dd | 8.4 (?) |  |  | 8.4 (?) |  |  |  |  | |
| 11a-H | 3.96, d |  |  |  |  | 8.4 (8.4) |  |  |  | |
| 11b-H | 3.58, d |  |  |  |  | 8.6 (8.4) |  |  |  | |
| 13-H | 5.82, dd | 10.0 (9.9) |  |  |  |  |  | 2.9 (2.9) |  | |
| 14-H | 5.43, dd | 10.2 (10.2) |  |  |  |  | 2.0 (2.0) |  |  | |

| Table 7. 1H-1H-NOESY peaks () for **53a** in C6D6 and internuclear distances (Å) for **53b** | | | | | | | | | | | | | |
| --- | --- | --- | --- | --- | --- | --- | --- | --- | --- | --- | --- | --- | --- |
| 1 | 6 | 5 | 4 | 3 | 153 | 7 | *exo*-8 | *endo*-8 | *exo*-11 | *endo*-11 | 13 | 14 |  |
|  | 2.31 | 3.23 | 3.62 | 3.71 | - | 3.80 | 4.00 | 3.76 | 5.62 | 6.42 | 6.10 | 5.38 | 1 |
|  |  | 2.27 | 3.90 | 3.91 | - |  2.20 | 3.75 | 3.89 | 4.65 | 5.29 | 4.70 | 4.24 | 6 |
|  |  |  | 2.23 | 3.82 | - | 3.97 | 5.49 | 4.94 | 2.65 | 3.84 | 4.37 | 5.01 | 5 |
|  |  |  |  |  2.23 |  - | 5.31 | 6.09 | 4.93 | 2.79 | 3.85 | 4.86 | 5.58 | 4 |
|  |  |  |  |  | - | 3.95 | 3.81 | 2.18 | 4.48 | 4.26 | 3.66 | 3.26 | 3 |
|  |  |  |  |  |  | - | - | - | - | - | - | - | 153 |
|  |  |  |  |  |  |  | 2.37 | 3.06 | 5.63 | 5.57 | 3.99 | 2.65 | 7 |
|  |  |  |  |  |  |  |  | 1.80 | 7.15 | 6.93 | 5.19 | 3.06 | *exo*-8 |
|  |  |  |  |  |  |  |  |  | 6.19 | 5.87 | 4.42 | 2.68 | *endo*-8 |
|  |  |  |  |  |  |  |  |  |  | 1.82 | 3.76 | 5.53 | *exo-*11 |
|  |  |  |  |  |  |  |  |  |  |  | 2.46 | 4.65 | *endo*-11 |
|  |  |  |  |  |  |  |  |  |  |  |  |  2.42 | 13 |
